# Supplementary material
Source: publisher figshare collection journal article supplement (https://gsapubs.figshare.com/ndownloader/files/23300141)
Supplement: Supplementary file 1 [file 23300141]

## Sheet: Table-S1
Table DR3. Compilation of fluid inclusion data
Reference	Volcano	Temperature	Sampling date	Li	Be	B	F	Na	Mg	Al	Si	P	S	Cl	K	Ca	Sc	Ti	V	Cr	Mn	Fe	Co	Ni	Cu	Zn	Ga	Ge	As	Se	Br	Rb	Sr	Y	Zr	Nb	Mo	Pd	Ag	Cd	In	Sn	Sb	Te	I	Cs	Ba	La	Ce
Bernard et al, 1990	St-Helens	657						5.6							3.9																8						0.095
	St-Helens	657						5.6							3.9																8.1						0.095
Gemmel, 1987	Cerro Negro	170	november to december 1981				7.5	3.5	2.4	4.6	5		76.774	330	3.4	5.9	0.009	5.7				3.5	0.003	0.17	0.3	0.7			0.079		0.4						0.18		0.02	0.19		0.75	0.004				0.15
	Cerro Negro	250					3.5	1.9	2.2	25	20		93.464	4000	1.7	0.4	0.007	82			0.1	14	0.005	0.72	0.3	0.5			0.085		3						0.28		0.006	0.35		1	0.003				0.09
	Cerro Negro	260					2	1.5	2	5.9	18		83.45	11000	1.3	1.5	0.004	103			0.1	104	0.008	0.28	0.2	0.8			0.095		3.2						0.29		0.006	0.36		0.95	0.003				0.14
	Cerro Negro	272					5.4	1	1.3	7.2	7.2		80.112	1050	1.5	0.9	0.002	45				46	0.005	0.21	0.2	0.4			0.045		0.5						0.2		0.005	0.2		0.84	0.003				0.08
	Cerro Negro	274					4.3	3.5	4.8	17	14		280.392	3100	3.2	2.5	0.006	66		0.06	0.2	14	0.007	0.25	0.4	0.3			0.075		2.4						0.26		0.008	0.33		0.99	0.003				0.12
	Cerro Negro	300					5.3	4.4	3.4	9.9	10		22.0308	520	1.5	3.6	0.001	4			0.1	3.6	0.007	0.22	0.8	1.6			0.031		0.1						0.19		0.003	0.16		0.8	0.003				0.26
	Cerro Negro	315					7.5	1.1	1.5	3.9	4.5		287.068	2100	1.4	2.9	0.002	25				10	0.002	0.18	0.2	0.4			0.045		0.7						0.2		0.004	0.21		0.82	0.002				0.04
	Masaya	150					1	3.9						42			0.0003					1.5	0.002	0.3					0.047		0.051						0.22		0.006	0.17		0.77	0.002
	Momotombo	456		0.02			6.7	11		11	17		1134.92	2920	3.6			276		0.23		50			0.4	1.5																					0.24
	Momotombo	471		0.05			7	11		53	16		134.855	1800	5.7	0.1	0.017	334		0.2	0.5	30	0.015	0.38	0.3	0.7			0.23		16						0.49		0.011	0.73		1.5	0.003				0.58
	Momotombo	485					2	7.7		13	11		162.894	1550	5.1	0.2	0.009	239		0.15	0.4	21	0.013	0.29	0.3	0.4			0.25		14						0.48		0.009	0.69		1.4	0.003				0.59
	Momotombo	500					3	3.5		1.9	12		647.572	2400	1.8	1.5	0.004					21	0.004	0.43	0.2	1.3			0.49		25						0.15		0.014	0.02		2.4	0.096				0.63
	Momotombo	536					8	3.6		25	18		654.248	2350	4.8	0.2	0.01	218		0.14	0.3	18	0.008	0.31	0.2	0.9			0.25		12						0.45		0.006	0.65		1.1	0.003				0.31
	Momotombo	666					5	7.1		14	17		140.196	2850	11		0.007	252		0.25	0.1	15	0.007	0.3	0.2	0.7			0.28		14						0.5		0.005	0.71		1.2	0.004				0.07
	Momotombo	765		0.03			5.2	2.7		42	48		1028.1	5600	25	4.6		156		0.26	0.4	8.1			0.2	1.9																					0.76
	Momotombo	770					42	19		133	121		1358.57	2200	41	0.6		598		0.59	0.5	15			8.4	7.6																					1.6
	Poas	344					27	13	1.9	23	19		590.826	1090	4.8		0.003	57		0.24	0.1	13	0.009	0.81	0.2	8.6													0.009			1.4	0.008				0.14
	Poas	561					5.6	3.4	1.7	23	19		567.46	1250	4.1	0.2	0.005	170		0.19	0.1	27	0.022	0.69	0.2	4.4													0.11			1.6	0.008				0.14
	Poas	711					2.4	1.6	0.5	2.6	73		667.6	1200	4.4	0.3	0.004	181		0.19		3.4	0.002	0.5	0.2	0.5													0.006			1.4	0.008				0.13
	Poas	724		0.05			1.4	5.4	0.9	12	23		494.024	1250	13		0.006	237		0.3	0.1	10	0.068	1.7	0.1	1													0.02			3.3	0.004				0.31
	Poas	819		0.05			1.3	9.2	1.5	23	42		640.896	1120	17	0.2	0.005	2600		0.34	0.1	24	0.053	0.83	0.6	3.3													0.18			2.6	0.003				0.58
	Poas	830					0.6	6	3.6	38	41		781.092	910	11	0.2	0.007	416		0.6	0.3	49	0.062	0.69	0.2	4.6													0.25			3.9	0.004				0.37
	Poas	851					0.7	29	11	134	81		874.556	880	79	4.5	0.005	739		0.69		17	0.071	0.73		6.9													0.13			3.8	0.004				0.23
	Poas	852		0.04			0.8	7.1	0.8	9.9	17		854.528	1120	14		0.006	112		0.29		7.2	0.067	1.6	0.3	1.3													0.19			3.3	0.004				0.22
	Telica	150		0.04			0.5	0.4	0.4	0.8			5.007	125	2.4	0.2	0.0001	0.4		0.04	0.1	0.4	0.001	0.18	0.04	0.4			0.077		0.058						0.25		0.003	0.29		0.66	0.002				0.04
Hedenquist, 1994	Satsuma Iwojima	102	1990-10-26			0.09	0.38	2.8	0.05	0.024			27548.5	38	0.2	0.07					0.003	0.034			0.003	0.027							0.0007														0.002
	Satsuma Iwojima	105	1990-10-26			0.84	410	6.9	0.04	0.41			24090.3	12140	1	0.34					0.002	0.06			0.02	0.06			1.71				0.002				0.01					0.08					0.009
	Satsuma Iwojima	165	1990-10-27			7.43	456	8.3	0.061	0.397			19500.6	5670	1.5	0.099					0.0003	0.238			0.013	0.012			1.52				0.0004				0.005					0.2					0.008
	Satsuma Iwojima	330	1990-10-26			28.1	154	8.7	0.05	1.51			21162.9	20720	1.1	0.2					0.003	0.12			0.006	0.027			3.96				0.002									0.33					0.008
	Satsuma Iwojima	505	1990-10-24			13.7	255	6.1	0.064	0.065			25772.7	34220	1.2	0.284					0.001	0.062			0.064	0.064			4.55				0.002				0.03					0.66					0.038
	Satsuma Iwojima	705	1990-10-24			29	488	15	0.15	3.74			20448.6	11800	4.8	16.2						1.18			0.036	0.24			3.27				0.008				0.16					0.78	0.03				0.011
	Satsuma Iwojima	877	1990-10-24			10.7	355	12	0.08	1.33			17965.1	13670	2.1	0.19						0.62			0.03	0.15			1.74				0.001				0.43					0.48	0.02				0.003
	Satsuma Iwojima	877	1990-10-27			18.07	368	6.3	0.15	1.13			18909.8	10480	1.3	0.41						0.81			0.009	0.17			1.81				0.002				1.07					0.57	0.025				0.003
Menyailov & Nikitina, 1980	New Tolbachik N	950	1975-10-01				540	29.2	7.5	24.5			2.90406	2615	10.2	7.8						7			3.5	0.384													0.006			0.013
	New Tolbachik S	980	1975-10-01				2800	420	6.1	290.3			62.8545	14609	182	3						33.5			2.17	15.6													0.002			0.09
	New Tolbachik S	1010	1976-08-14			32.3	2100	200	5	45.7			438.613	18233	165	23.1	0.0019	1.8		0.025	0.38	37	0.012	1.08	5.9	9.61			24		36	0.78							0.006	0.5		0.09	13.8			0.38		0.036	0.016
	New Tolbachik S	1020	1975-10-01				2700	700	9.3	202.5			76.9743	21347	240.5	3.4						9			14	9.26													0.002			0.03
Menyailov et al, 1986	Momotombo	790	1982									58	21.0294			3.5				3.8	2.9	0.2								0.1	0.52									1.2			0.016
Mizutani, 1970	Showa Shinzan	194	1959-07-01											234												0.14
	Showa Shinzan	222	1958-08-08											330												0.12
	Showa Shinzan	300	1959-07-04											290												0.28
	Showa Shinzan	328	1959-07-06											285												0.27
	Showa Shinzan	430	1959-07-04											1310											0.009	1.2
	Showa Shinzan	460	1959-07-09											1130											0.011	1.6
	Showa Shinzan	464	1959-07-04											250												0.12
	Showa Shinzan	470	1958-08-14											1130											0.012	1.5
	Showa Shinzan	645	1959-07-01											970												1
	Showa Shinzan	661	1958-08-10											885											0.019	1.3
	Showa Shinzan	700	1959-07-09											1000											0.007	0.55
	Showa Shinzan	750	1959-07-07											763											0.005	0.6
	Showa Shinzan	759	1958-08-12											868											0.018	2
This paper	Merapi	266	2004-07-01			13	59.7	0.6	0.37	1.48	17.2		520.06	893	1.13			0.209	0.006	0.018	0.073	1.48	0.00094	0.008	0.003	0.06	0.001	0.0026	0.67		2.37		0.0149	0.00066	0.0048		0.004			0.0005	0.00124	0.011	0.0031	0.004			0.11	0.00078	0.0014
	Merapi	417	2006-08-01	0.00652			245	1.21	0.47	1.35	23.84		10578.8	7193	0.63	1.03	0.00196	0.0536		0.00813	0.0209	2.02	0.0461	0.0556	0.279	0.15	0.000587	0.000497	2.99	0.046	11.46		0.0191	0.00049	0.0114		0.000601	3e-05	0.00026	0.0414	0.00418	0.0188	0.0213	0.0288			0.0555	0.000928	0.001798
	Merapi	515	2006-08-01	0.0334		0.33	320	2.31	0.25	1.46	31.86		6733.41	4849	2.27	0.4	0.00869	0.0455	0.000689		0.0439	1.43	0.00778	0.00996	0.161	0.42	0.000377	0.000398	2.21	0.0438	8.22		0.0195	0.00038	0.0222			1.1e-05		0.086	0.0216	0.219	0.0399	1.3e-05			0.0342	0.00023	0.001862
	Merapi	515				7.55	296	1.2	0.14	1.52	64.4		3671.8	5630	0.65	0.6		0.12	0.115		0.031	0.65	0.001	0.007	0.008	0.1	0.002	0.003	0.11	0.137	2.85		0.0034	0.0004	0.007		0.477			0.006	0.0003	0.004	0.0009	0.092			0.009	0.0004	0.0007
	Merapi	526				40.2	185	2.11	1.24	3.39	33.9		7644.02	6710	2.83	4.6		1.28	0.188	0.101	0.391	8	0.0046	0.047	0.005	0.17	0.004	0.009	0.44	0.021	11.8		0.026	0.0017	0.011		0.783			0.003	0.0049	0.06	0.005	0.231			0.042	0.0016	0.0032
	Merapi	572	2004-07-01			36	124	3.43	0.89	3.44	23.9		263.034	3030	2.3	3.46		0.4	0.011	0.064	0.102	2.58	0.00144	0.029		0.15	0.0016	0.004	0.98	0.034	5.43		0.0753	0.0039	0.0121		0.02	0.0003		0.0161	0.00458	0.066	0.0098	0.003			0.281	0.0032	0.00718
	Merapi	588				19.6	303	2	0.46	2.61	70.5		5207.28	6500	1.21	3.7	0.011	0.535	0.09	0.106	0.118	3.06	0.0019	0.05	0.005	0.15	0.003	0.013	0.12	0.11	8.32		0.03	0.0014	0.011		0.346			0.004	0.0018	0.041	0.001	0.124			0.048	0.0017	0.0031
	Merapi	593				17.5	193	11.5	0.6	5.52	42.8		5307.42	3830	2.99	4.3		0.219	0.242	0.066	0.113	4.69	0.002	0.039	0.0022	0.52	0.003	0.023	3.45	0.031	3.46		0.048	0.0017	0.005		0.256	0.001		0.004	0.002	0.046	0.005	0.212			0.02	0.0012	0.003
	Merapi	602				8.19	228	2.71	0.32	1.71	4.18		2596.96	5330	1.05	2.1		0.034	0.183	0.081	0.051	0.91	0.0016	0.046	0.009	0.14	0.002	0.003	0.49	0.066	3.39		0.011	0.00029	0.005		0.148			0.002	0.0004	0.003	0.0007	0.04			0.012	0.0004	0.0006
	Merapi	604				27.5	223	9	0.81	9.13	27.5		3638.42	5420	4.99	5.95		0.179	0.04	0.123	0.154	4.3	0.0023	0.014	0.027	0.18	0.002	0.003	0.3	0.068	13.9		0.082	0.0042	0.016		0.161			0.015	0.0017		0.002	0.041			0.066	0.0027	0.0057
	Merapi	622	23-08-2005				110	4.57	0.38	2.49	1000		3438.14	957	1.5			0.101	0.264		0.051	1.7	0.00061	0.01	0.011	0.168	0.0005	0.0021	0.149	0.024	1.55	0.0103	0.0081	0.00028	0.0031	0.0001	0.284			0.004	0.00091	0.014	0.0009	0.079	1.24		0.009	0.00028	0.00051
	Merapi	705				38.7	343	1.14	0.12	2.65	6.3		3438.14	7250	0.44	0.6		0.077	0.126	0.109	0.034	1.06	0.0007	0.049		0.13	0.002	0.034	3.72	0.012	12		0.007	0.00025	0.007		0.357			0.003	0.00014	0.013	0.007	0.219			0.015	0.0003	0.0006
	Merapi	754				30.5	194	0.74	0.07	0.25	23.5		1802.52	6620	0.31	0.4		0.012	0.199	0.096	0.026	0.12	0.00018	0.031	0.01	0.14	0.001	0.003	1.73	0.043	9.2		0.006	7e-05	0.003		0.182	0.0053		0.003	2e-05		0.0012	0.003			0.005	0.0005	0.0014
Oana, 1962	Showa Shinzan	220	1955-08-01					13.3	7.5	13	29				1.7	9.4								0.00075	0.004	0.02		0.00075	0.0075													0.0015
	Showa Shinzan	525	1955-08-01					22.9	3.8	13	50				11.2	1.6								0.00075	0.035	0.4		0.003	0.3										0.0075			0.0065
	Showa Shinzan	760	1955-08-01					23	39.6	15	65				15.9	9.86									0.035	0.55			0.75										0.003			0.03
Stoiber & Rose, 1970	Arenal	188	1969-03-29				2	2	1				20.028	240	1	2
	Cerro Negro	216	1968-07-10					53	26				18.6928	7300	5	40
	Cerro Negro	275	1969-01-19				0.8	48	25				5340.8	2900	50	58
	Cerro Negro	343	1969-07-10				0.7	18	18					4200	8	65
	Cerro Negro	427	1969-03-23				0.4	3	1				2.6704	180	3	2
	Cerro Negro	570	1969-01-19				1.1	6	3				50.07	1400	8	9
	Cerro Negro	610	1968-11-09					16	6				5.3408	1500	7	15
	Cerro Negro	740	1969-03-24				1.5	34	1				170.238	2800	43	1
	Fuego	163	1969-02-09				0.5	7	2				220.308	5300	1	4
	Fuego	257	1967-08-20				2	13	2				10.014	2100	2	6
	Fuego	442	1969-02-09					8	8				934.64	3200	1	5
	Izalco-L	258	1968-12-05					6	2				2.6704	150	2	4
	Izalco-L	293	1969-07-13				4	1						750	1
	Izalco-L	300	1968-07-04				0.2	2	4				3.6718	1300	8	5
	Izalco-L	303	1967-06-20					9	8				5.3408	800	3	9
	Izalco-L	307	1968-11-12				3	2						850	2	5
	Izalco-L	308	1969-03-16				12	1					3.6718	1300		3
	Izalco-L	312	1968-08-13				0.2	2	7				4.3394	900	2	7
	Izalco-L	312	1969-02-21				0.4	13	1				1.669	80	3	5
	Izalco-L	327	1968-10-09					1	2				3.338	850	8	3
	Izalco-L	340	1967-11-18				6	2	1				5.6746	1500	1	3
	Izalco-L	346	1967-07-25					4	11				4.3394	850	1	5
	Izalco-L	346	1969-05-22				0.2	3	1				4.0056	1500	1	4
	Izalco-L	347	1967-08-03					3	11				1.669	1400	1	2
	Izalco-L	359	1966-11-22				4	4	2				3.6718	1200	2	3
	Izalco-L	361	1968-02-11					2	15				8.0112	1500	1	21
	Izalco-L	370	1967-11-17				9	2	2				3.6718	1100	2	7
	Izalco-L	374	1967-01-11				6	3	7				8.6788	2500	2	41
	Izalco-L	374	1967-08-15				11	1					10.6816	900		2
	Izalco-L	375	1966-08-22				7	6	3				4.0056	1800	2	5
	Izalco-L	378	1967-05-25				0.2	2	14				5.6746	2700	1	2
	Izalco-L	385	1966-07-26					7	8				7.3436	1800	5	20
	Izalco-L	388	1967-02-14				0.2	1	4				1.669	1900	1	5
	Izalco-U	238	1968-11-12				4	3	1				4.3394	1700	3	13
	Izalco-U	281	1967-08-03				1	1	1				3.338	150	1
	Izalco-U	281	1967-08-15				5	1	1				1.669	550	1
	Izalco-U	306	1967-11-17				5	1	1				4.3394	400	1	2
	Izalco-U	306	1967-11-17				4	2	2				4.0056	350	1	8
	Izalco-U	338	1969-07-13					3	1					570	1	1
	Izalco-U	339	1967-07-25				3	5	1				3.338	1200	2	6
	Izalco-U	374	1967-03-16				4	12	11				13.352	780	6	59
	Izalco-U	480	1964-08-11				92	24	5				16.69	2700	7	9
	Izalco-W	220	1968-07-04				1	3						390	8	1
	Izalco-W	220	1968-11-12				0.3	1	1					470	3	3
	Izalco-W	223	1968-12-05					1	1					50		1
	Izalco-W	225	1968-10-09				0.6	1	1				1.669	60	2	4
	Izalco-W	236	1969-02-21					1					1.669	35	3	1
	Izalco-W	240	1968-09-13				0.2	1	1					60	2	9
	Izalco-W	249	1969-07-13					1	1					180	1	1
	Izalco-W	263	1969-05-22				0.2							130	1	1
	Izalco-W	274	1969-03-16					2	3				1.669	300	2	1
	Izalco-W	297	1967-08-03				1	1					3.338	350		2
	Izalco-W	302	1967-11-18				2	2	1				7.6774	430	1	2
	Izalco-W	310	1967-11-17				10	2	1				5.007	250	1	4
	Izalco-W	315	1967-06-20				1	3	2				2.6704	220	1	2
	Izalco-W	317	1967-08-15				1	1					5.007	220		1
	Izalco-W	317	1967-08-16				1	4	1				3.6718	190	1	2
	Izalco-W	322	1967-07-25				1	4	1				4.0056	230	1	7
	Izalco-W	331	1968-02-11				1	2	1				5.007	160	1	3
	Izalco-W	342	1965-11-09				43	9	5				5.3408	1700	5	29
	Izalco-W	346	1966-08-22				6	2	2					850	2	2
	Izalco-W	354	1966-08-11				20	7	6				23.366	1800	4	35
	Izalco-W	368	1967-05-25				1	2	1					160		2
	Izalco-W	369	1966-11-22				1	6	3				5.007	1600	4	4
	Izalco-W	382	1967-03-29					12	9					550	4	25
	Izalco-W	386	1967-02-14				20	4	3				4.3394	1900	2	27
	Izalco-W	391	1967-03-16				4	6	4				3.6718	800	3	27
	Izalco-W	399	1966-03-14				37	10	10				33.38	3300	10	110
	Izalco-W	415	1965-09-21				38	4	3				2.0028	850	3	7
	Izalco-W	420	1965-01-15				200	9	6				10.014	4400	7	7
	Izalco-Y	378	1967-11-18				7	6	2				6.676	800	3	5
	Izalco-Y	381	1969-03-16					3	1					60	2	2
	Izalco-Y	384	1968-11-01				2	16	2				4.6732	4300	3	23
	Izalco-Y	385	1966-07-02				2	9	15				9.3464	1800	5	23
	Izalco-Y	447	1967-11-18				20	8	6				10.014	4600	3	18
	Izalco-Y	480	1965-11-09				250	25	14				333.8	9500	11	250
	Izalco-Y	488	1966-07-04					4	3						1	9
	Izalco-Y	505	1965-02-12				240	22	14					4200	10	17
	Izalco-Y	513	1964-08-11				370	6	3					6200	5	6
	Pacaya	420	1966-01-21				0.7	53	63				767.74	50000	35	90
	Pacaya	467	1966-01-08				4	17	33				1669	3200	7	55
	Pacaya	470	1966-03-20				88	9	22				40.056	3100	9	45
	Pacaya	480	1966-02-01				170	90	69				3104.34	38000	42	94
	Pacaya	796	1969-07-16				240	23	3					10000	15	5
	Santiaguito	85	1966-11-15				22	1					66.76	1200	2
	Santiaguito	91	1967-08-08				25	30	6				3.338	1000	5	75
	Santiaguito	126	1967-08-23					9	19				33.38	12000	1	2
	Santiaguito	132	1966-01-28				3	60	120				1669	13000	75	110
	Santiaguito	132	1967-07-21				1	10	1				2.6704	800	1	7
	Santiaguito	135	1968-11-02					11	2				166.9	1200	2	7
	Santiaguito	135	1964-08-02				160	7	1				3.338	2100	4	2
	Santiaguito	165	1968-12-28				0.1	2	1				367.18	1600	1	1
	Santiaguito	173	1967-03-20					4	7				330.462	1700		160
	Santiaguito	174	1967-03-19				4	3	3				25.035	370	2	7
	Santiaguito	180	1968-09-08					1	1				1.669	50	2	9
	Santiaguito	182	1968-07-12				0.2	10						10	3	5
	Santiaguito	197	1966-04-02											14000
	Santiaguito	204	1966-01-30				41						500.7	11000	1	4
	Santiaguito	210	1967-07-22				11	23	5				18.6928	4700	4	28
	Santiaguito	210	1967-11-13				5	10	1				5.3408	1000	1	8
	Santiaguito	212	1967-08-24				3	23	2				3.6718	7500	5	7
	Santiaguito	217	1968-10-12					1	1				1.669	130	2	7
	Santiaguito	218	1967-01-05				6	13	9				183.59	1600	7	41
	Santiaguito	224	1968-11-01					2	1				4.0056	230	2
	Santiaguito	230	1968-12-28				0.2	1	3				3.0042	230	1	2
	Santiaguito	235	1969-04-23				0.2	1	1				3.338	2100	1	4
	Santiaguito	241	1969-07-19				4	1						850	1	1
	Santiaguito	248	1967-11-13				16	11	2				3.6718	750	2	12
	Santiaguito	260	1969-03-04				1	10	3				4.0056	12000	3	4
	Santiaguito	260	1969-07-19				13	2	1				4.0056	5600	1	1
	Santiaguito	262	1965-02-17				230	13	5				26.704	1500	4	17
	Santiaguito	265	1965-02-18				60	31	9				33.38	10000	13	5
	Santiaguito	266	1967-08-24				24	18	2				12.6844	2400	3	9
	Santiaguito	268	1967-07-06				12	11	2				700.98	1800	1	4
	Santiaguito	281	1968-12-28				1	1	1				22.0308	770	1	2
	Santiaguito	295	1968-09-08				2	4	2				9.3464	200	3	9
	Santiaguito	305	1969-04-23				3	4	1				12.0168	1100	2	14
	Santiaguito	307	1968-10-12				1	4	4				133.52	1000	3	9
	Santiaguito	313	1967-07-22				1	22	2				260.364	640	1	8
	Santiaguito	315	1968-12-28					2	1				500.7	4600	1	3
	Santiaguito	318	1967-06-06				4	9	1				33.38	550	1	2
	Santiaguito	331	1967-11-13				15	49	10				313.772	1900	7	82
	Santiaguito	525	1964-08-02				2600	29	1				13.352	2600	3	1
	Santiaguito	560	1965-08-29				130	8	8						10	48
	Santiaguito	574	1965-10-23				170	10	4				3.338	350	3	15
	Santiaguito	650	1965-10-25				37	58	28				150.21	7200	23	90
	Santiaguito	650	1965-10-25				49	46	30				801.12	7400	14	88
	Santiaguito	789	1966-02-13				0.4	41	17				333.8	8500	27	92
Symonds et al, 1990	Augustine, AK	390	1986-07-10			2.2	5400	0.84	0.53	0.95	543		684.29	47000		0.95		0.97	2	0.02	0.049	15.55		0.008					0.35		200		0.005		0.61		3.1			0.64			0.028				0.012
	Augustine, AK	431	1986-07-10			9.2	1600	0.63	0.19	0.71	88.4		40.056	15000		0.72		0.26	0.36	0.002	0.038	1.02		0.018					0.12		50		0.002		0.23		1.5			0.16			0.008				0.008
	Augustine, AK	433	1986-07-14			7.6	1100	0.5	0.12	0.74	64.8		16.69	9000		0.37		0.2	0.13	0.001	0.008	0.34							0.046		25		0.003		0.1		0.64			0.07			0.005				0.008
	Augustine, AK	500	1986-07-10			1.2	1000	0.16	0.08	0.14	43		133.52	9600		0.2		0.2	0.46			0.69							0.14		25				0.004		1.1			0.004			0.009				0.003
	Augustine, AK	625	1986-07-14			2.5	2100	0.59	0.16	0.93	91.5		86.788	18000		0.74		0.38	0.21	0.003	0.008	1.06		0.006					2.6		50		0.005		0.57		2.6			0.1			0.041				0.007
	Augustine, AK	631	1986-07-10	0.007			4250	6.62	0.44	1.07			163.562	32000	8	0.99			0.031	0.01	0.13	2.07		0.017					6.1		100		0.003		8.1		0.5			0.43			0.21				0.011
	Augustine, AK	635	1986-07-14			1.6	480	1.56	0.12	0.71	54.6		41.725	6600	1	0.56		0.088	0.27		0.026	0.7							0.22		25		0.003		1		1.6			0.069			0.006				0.004
	Augustine, AK	642	1986-07-10			1.8	1200	0.43	0.14	0.38	39.1		33.38	9100		0.42		0.086	0.1		0.009	1.03							0.89		25		0.001		0.37		0.86			0.051			0.018				0.005
	Augustine, AK	870	1987-08-29	0.028		31	1000	21	0.07	0.49	160		767.74	20000	22	1.2		0.02	0.007	0.004	0.061	5.7		0.008					4.7		30		0.003		0.004		1.1			0.15			0.3				0.003
	Augustine, AK	870	1987-08-29	0.032		32	1100	22	0.08	0.45	140		734.36	21000	22	1.2		0.02		0.004	0.062	5.7		0.009					4.9		40		0.003		0.016		1.1			0.16			0.3				0.002
Symonds et al., 1987	Merapi	576	01- to 02-1984	0.007			120		6.7				163.562	3500	6.2				0.029	0.12	0.16	8	0.003	0.07			0.02		0.72		22		0.2				0.08			0.05
	Merapi	576	01- to 02-1984	0.002			140		3.9				333.8	3700	2.6				0.98								0.49		0.35		b/l		0.095				0.16			0.01
	Merapi	576	01- to 02-1984	0.006			220		3.9	23			196.942	3300	2.9				0.083								0.01		0.34		40		0.089				0.18
	Merapi	796		0.024			310		2.3	25	n/d		173.576	3600	20				0.022	0.05	0.22	11	0.002	0.05			0.01		0.96		8		0.19				0.12			0.04
	Merapi	796		0.011			110		5	n/d	n/d		273.716	3200	6.8				0.1	0.08	0.16	7.1		0.26			0.09		0.28		240		0.046				0.11			0.08
	Merapi	796		0.01			230		17	n/d	n/d		834.5	3800	9.6				0.8								0.58		0.84		8		0.098				0.15			0.02
	Merapi	796		0.088			130		24	120	n/d		180.252	3100	14				1.1								0.43		0.63				0.21				2.8			0.01			0.16
Symonds et al., 1996	Showa Shinzan; Usu	336	1985-06-24			18	64	6	3	18	14			485	2	22		0.008	0.008	0.004	0.2	3.3		0.021	0.034	0.58			1.1			0.01	0.074				0.61		0.004	0.1						0.009	0.098
	Showa Shinzan; Usu	560	1961-05-08			12.9	186	3	5	2.5	29		46.732	1360		2		0.006	0.006	0.027	0.03	1.5		0.023	0.11	0.63			0.96			0.003	0.008						0.039	0.01							0.1
	Showa Shinzan; Usu	588	1974-09-01			19.6	153			0.88	5			735		3		0.002	0.002		0.009	0.57			0.006	0.25			1.1			0.002	0.003						0.035							0.003	0.004
	Showa Shinzan; Usu	600	1973-10-05			19.2	170			0.19	7.3		40.056	780		0.9		0.002	0.002		0.001	0.04			0.002	0.11			1.1				0.001						0.014								0.002
	Showa Shinzan; Usu	635	1963-08-07			24.6	310	9		2.7	54		53.408	1880		9		0.002	0.002		0.009	0.23			0.004	2.9			1.7			0.002	0.011						0.037	0.01					0.12	0.002	0.062
	Showa Shinzan; Usu	637	1964-09-23			20.9	290	3		0.97	32		43.394	1390		6		0.005	0.005	1.1	0.088	4.2		0.42	0.081	1.8			1.5			0.004	0.01				0.035		0.026	0.013						0.004	0.082
	Showa Shinzan; Usu	661	1958-08-10			19.3	209	3	3	1.2	21		33.0462	919		5		0.007	0.007		0.006	0.28			0.015	0.52			1.4		1.1	0.002	0.003						0.042						0.12		0.035
	Showa Shinzan; Usu	662	1962-08-06			21.7	298	7		2.3	54		53.408	1990	3	0.9		0.004	0.004		0.004	0.22			0.003	0.41			1.7			0.004	0.005						0.031						0.2	0.002	0.088
	Showa Shinzan; Usu	722	1960-08-11			11.2	213	3	3	0.62	25		56.746	1010		0.9		0.002	0.002		0.004	0.14		0.028	0.007	0.49			1		0.8	0.003	0.002						0.076	0.008					0.064	0.002	0.009
	Showa Shinzan; Usu	830	1955-08-14			27.6	309	130		7.1	130		43.394	1080	9	53		0.002	0.002		0.14	0.99			0.02	0.32			3.1			0.025	0.032		0.031		0.046		0.076	0.008			0.13			0.003	0.15
Taran et al., 1995	Kudryavy	535	1992-01-01	0.002		35.3		2.44	0.12	4.8	97.9	22.7		13580	15.5	2300	0.056	0.16		0.015	0.017	2.28		0.05	0.76	0.25		0.09	0.63		0.36	0.01	0.01		1.2		0.002			0.09		0.1	0.12	0.08	0.8		0.05		0.004
	Kudryavy	585	1991-01-01	0.024		38.5	562	22.5	1.7	9.65	184			12210	12.8	5	n/a	0.7		0.024	0.12	3.7	0.001	0.05	0.032	0.58		0.037	0.73		9.4	0.038	0.023		0.38		0.004			0.23		0.38	0.24		6.7		0.38
	Kudryavy	605	1992-01-01	0.007		17.54	460	2.56	4.3	8.9	11.3	4		2070	20.5	14.3	0.05	0.64		0.07	0.18	17.65	0.005	0.05	0.91	13.5		0.03	0.54	0.1	0.24	0.01	0.055		0.65		0.16			0.7		0.21	0.51	0.015	1.4		0.14		0.005
	Kudryavy	825	1992-01-01	0.015		42	105	5	0.88	7.1	98.8	2		12850	9.53	1.73	0.06	0.13		0.115	0.055	3.62	0.003	0.32	0.09	1		0.01	1.25	0.2	0.75	0.05	0.015		1.28		0.11			0.88		0.14	0.1	0.005	6.1		0.42		0.003
	Kudryavy	870	1991-01-01	0.029		36.6	503	41.2	1.76	13	197			15380	28.66	5.5	n/a	0.62		0.045	0.21	6.8	0.16	0.055	0.13	1		0.038	1.55		10.4	0.75	0.13		0.46		0.27			0.58		0.13	0.02		11.6	0.01	0.074
	Kudryavy	940	1992-01-01	0.03		33	164	6.1	0.5	3.9	79.1	30.8		8580	5.62	2	0.06	0.14		0.13	0.09	7.3	0.006	0.41	0.27	3.1		0.027	1.2	0.17	0.75	0.045	0.01		0.98		0.2			0.23		0.14	0.79	0.01	5.4		0.15		0.002
Taran et al., 2001	Colima	738	1997-08-01			26	243	29	1.42		56		767.74	7320	17	1.35		0.633	160	0.079	0.05	2.6		0.042	0.87	4.97			0.368	0.37			0.032				0.097			0.045			0.049				0.45
Taran et al., 2001	Colima	742	1997-03-01			28	310	36	1.2		98		517.39	10500	22	1.2		0.623	0.263	0.169	0.056	3.27	0.002	0.023	0.931	5.3			0.433	0.45			0.056				0.091			0.055			0.042				0.463
Taran et al., 2001	Colima	828	1997-06-01			18	250	24	1.025		74		1332.53	6550	26	1.7		0.7	1.04	0.121	0.008	4.24		0.015	0.44	8.14			0.525	0.298			0.016				0.182			0.74			0.13				0.32
Berlo et al., 2014	Kawa Ijen	350	2007	0.05	0.07	103		320	29	96	209	30	433.636	25383	45	121	2.8	4.4	1.1	16.5	2.5	131		7.5	13.6	5.2			16.1	6.5		0.13	0.46	0.03	0.03		0.06					0.05	0.2	2.1			0.26	0.03	0.03
	Kawa Ijen	350	2007	0.18	0.14	316		464	40	231	1559	62	3635.87	66821	60	491	6.2	29	2.3	6.6	0.3	133		10.3	21.9	11.8			42.4	23.9		0.3	2.56	0.1	0.2	0.05	0.47			0.01		0.33	0.46	5.5			4.61	0.12	0.22
	Kawa Ijen	350	2007	0.08	0.08	176		199	16	59	605	28	2168.18	37895	10	113	3.1	14	1.2	3.2	0.1	45		5.2	11.3	5.3			20.4	12.5		0.11	0.27	0.03	0.06	0.03	0.23					0.14	0.21	3			1.65	0.03	0.03
Wahrenberger et al., 2002	Kudryavy	160				16.1			0.0912	0.178										0.0283	0.00347	0.318		0.0735	0.034	0.333			0.264	0.0338	0.578						0.00113					0.00997	0.00258	0.00104	0.469		0.0329
	Kudryavy	300				8.73			0.404	8.41								21.9	0.0199	0.142	26.8	1.77		0.0478	0.0311	0.126	0.00479		0.168		2.92	0.00152	0.0507		0.00271		0.000561					0.0326	0.00258	0.00494	1.89		0.0809
	Kudryavy	470				11.9				0.661	4.71							0.115	0.00328	0.127	0.00195			0.0455	0.0116	0.115	0.00556		2.32		4.82	0.00266	0.00463		0.0103		0.00304			0.0012	0.00108	0.0753		0.0223	1.63	0.00274	0.184
	Kudryavy	680				17.7		3.03	0.334	0.665	3.8					1.66			0.00369	0.103	0.0046	0.0365		0.419	0.0205	0.501	0.00946		2.4	0.7	4.54	0.023			0.0159		0.0107			0.0395	0.00469	0.42	0.0406	0.016	1.72	0.0414	0.441
	Kudryavy	710				20.1		1.08	0.413	1.01	4.66							0.123	0.00418	0.239	0.00731	0.601		0.0844	0.0333	0.64	0.0188		2.55		10.4	0.0533			0.0271		0.127				0.00389	0.197	0.0221	0.0196	3.07	0.0139	0.892
	Kudryavy	920	from 27-08-95 to 1-9-95			10.5		13.2	1.19	0.897	3.08				13.2	1.13		0.345	0.014	0.182	0.035	4.78		0.107	0.0544	1.28	0.0281		1.86		6.85	0.0621			0.0433		0.204			0.0554	0.00437	0.287	0.0145	27.7	2	0.00936	0.85
Zelenski et al., 2005	Mutnovsky	410	summers of 2000-2002	0.005		18		4.6	0.55	1.6	69				1.6	1.9		0.093	0.017	0.009	0.007	0.61		0.004	0.003	0.06	0.001		6.9	0.32	4	0.003	0.006		0.056	0.001	0.001		0.001	0.007		0.005	0.013	0.253	1.1		0.008
	Mutnovsky	450	summers of 2000-2002	0.003		25		8	0.28	2.1	112				1.6	3.1		0.11	0.015		0.009	0.61		0.01	0.008	0.07	0.001		8.6	0.5	6	0.003	0.011		0.092	0.015	0.005		0.001	0.011		0.008	0.03	0.349	1.7		0.02
	Mutnovsky	480	summers of 2000-2002	0.002		27		18	0.28	4.8	33				2.2	2.8		0.087	0.019	0.02	0.017	2.1		0.019	0.008	0.048	0.002		3.8	0.29	3.8	0.001	0.014		0.025	0.002	0.005		0.001	0.032		0.014	0.012	0.12	0.35		0.085
	Mutnovsky	507	summers of 2000-2002	0.002		26		2.3	0.45	2.2	29				1.5	1.8		0.078	0.017	0.015	0.013	1.1		0.016	0.026	0.16	0.002		4.7	0.11	3.7	0.003	0.026		0.055	0.002	0.005		0.006	0.025		0.017	0.019	0.145	1.1		0.017
[truncated: 24 more columns]
